# Supplementary material for: Mesoporous Silica Matrix as a Tool for Minimizing Dipolar Interactions in NiFe2O4 and ZnFe2O4 Nanoparticles
Source: PubMed Central journal article supplement (PMC5535217; doi:10.3390/nano7070151), 2017-06-22
Supplement: nanomaterials-07-00151-s001.pdf [file nanomaterials-07-00151-s001.pdf]

**The MCM matrix as a reducing agent of dipolar interactions in  $\text{NiFe}_2\text{O}_4$  and  $\text{ZnFe}_2\text{O}_4$  nanoparticles.**

M. Virumbrales, R. Saez-Puche, M. J. Torralvo, V. Blanco-Gutierrez

Departamento de Química Inorgánica, Facultad de Ciencias Químicas, Universidad Complutense de Madrid, 28040 Madrid, Spain

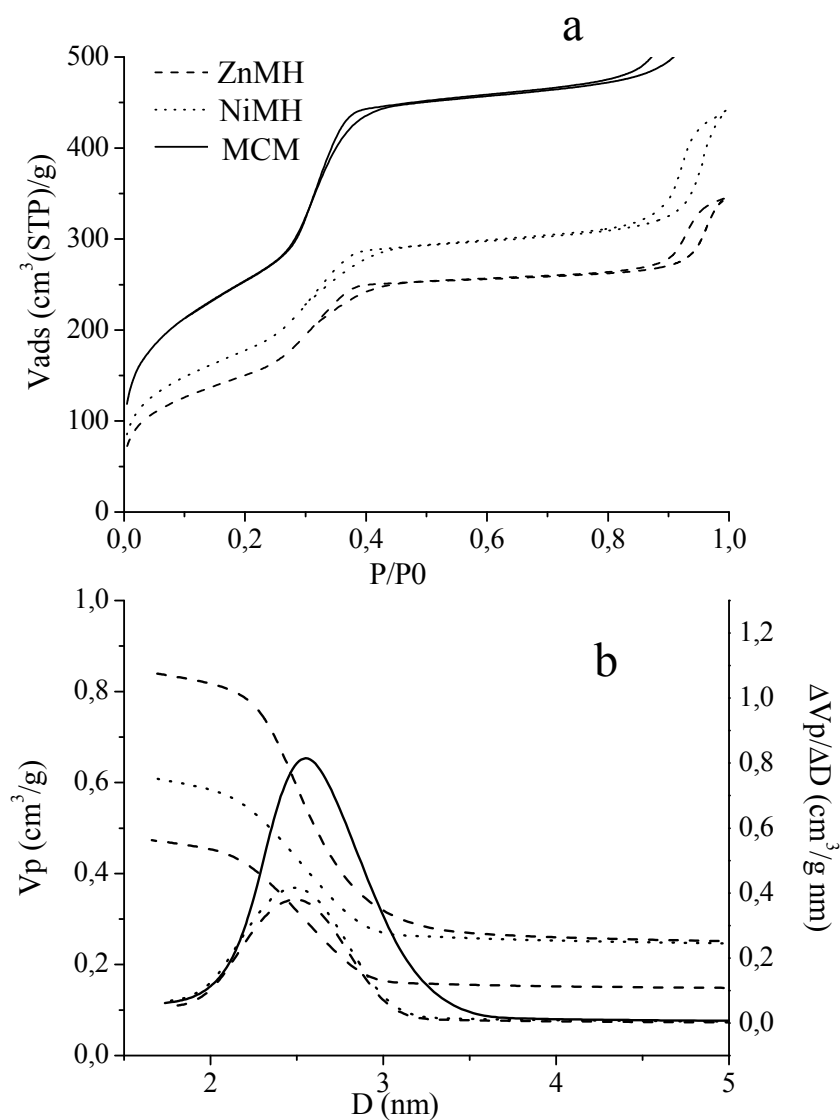

**Figure S1.** Adsorption-desorption isotherms (a) and cumulative pore volume and pore size distribution (b) of the samples.

Table S1. Textural parameters for the prepared MCM-type matrix and the composites.

| Sample | $S_{\text{BET}}$ ( $\text{m}^2/\text{g}$ ) | $V_{\text{p}}$ ( $\text{cm}^3/\text{g}$ ) | $d_{\text{pore}}$ (nm) |
|--------|--------------------------------------------|-------------------------------------------|------------------------|
| MCM    | 925                                        | 0.84                                      | 2.6                    |
| NiMH   | 648                                        | 0.61                                      | 2.5                    |
| ZnMH   | 547                                        | 0.47                                      | 2.5                    |
